# Supplementary material
Source: Springer Nature journal article supplement (https://www.springermedizin.de/resource/supplementary/12876_2012_813_MOESM2_ESM.pdf/9437766)
Supplement: MOESM2 [file 9437766]

|                |               | D'           |               |               |              |              |
|----------------|---------------|--------------|---------------|---------------|--------------|--------------|
|                |               | rs2301756A>G | rs12423190T>C | rs12229892G>A | rs7958372T>C | rs4767860A>G |
| r <sup>2</sup> | rs2301756A>G  | -            | 0.956         | 0.950         | 0.931        | 0.953        |
|                | rs12423190T>C | 0.036        | -             | 1.000         | 0.933        | 0.969        |
|                | rs12229892G>A | 0.105        | 0.285         | -             | 0.983        | 0.978        |
|                | rs7958372T>C  | 0.859        | 0.055         | 0.112         | -            | 0.971        |
|                | rs4767860A>G  | 0.199        | 0.205         | 0.509         | 0.503        | -            |
